# Supplementary material
Source: PubMed Central journal article supplement (PMC5710545)
Supplement: jamaophthalmol-135-954-s001.pdf [file jamaophthalmol-135-954-s001.pdf]

## Supplementary Online Content

Bountziouka V, Cumberland PM, Rahi JS. Trends in visual health inequalities in childhood through associations of visual function with sex and social position across 3 UK birth cohorts. *JAMA Ophthalmol*. Published online August 10, 2017. doi:10.1001/jamaophthalmol.2017.2812

**eFigure 1.** Flow Chart Indicating Recruitment and Collection of Ophthalmic Data at Age 15/16 Years in Three UK Birth Cohorts.

**eTable 1.** Distribution of the Three UK Birth Cohort Members' Baseline Characteristics According to Their Participating Status.

**eTable 2.** Distribution of the Three UK Birth Cohort Members' Baseline Characteristics According to Recording of Valid or Missing Acuity Data.

**eTable 3.** Distribution of Cohort Member's (CM's) Social Determinants of Health at Birth and Early Life Across Cohort.

This supplementary material has been provided by the authors to give readers additional information about their work.

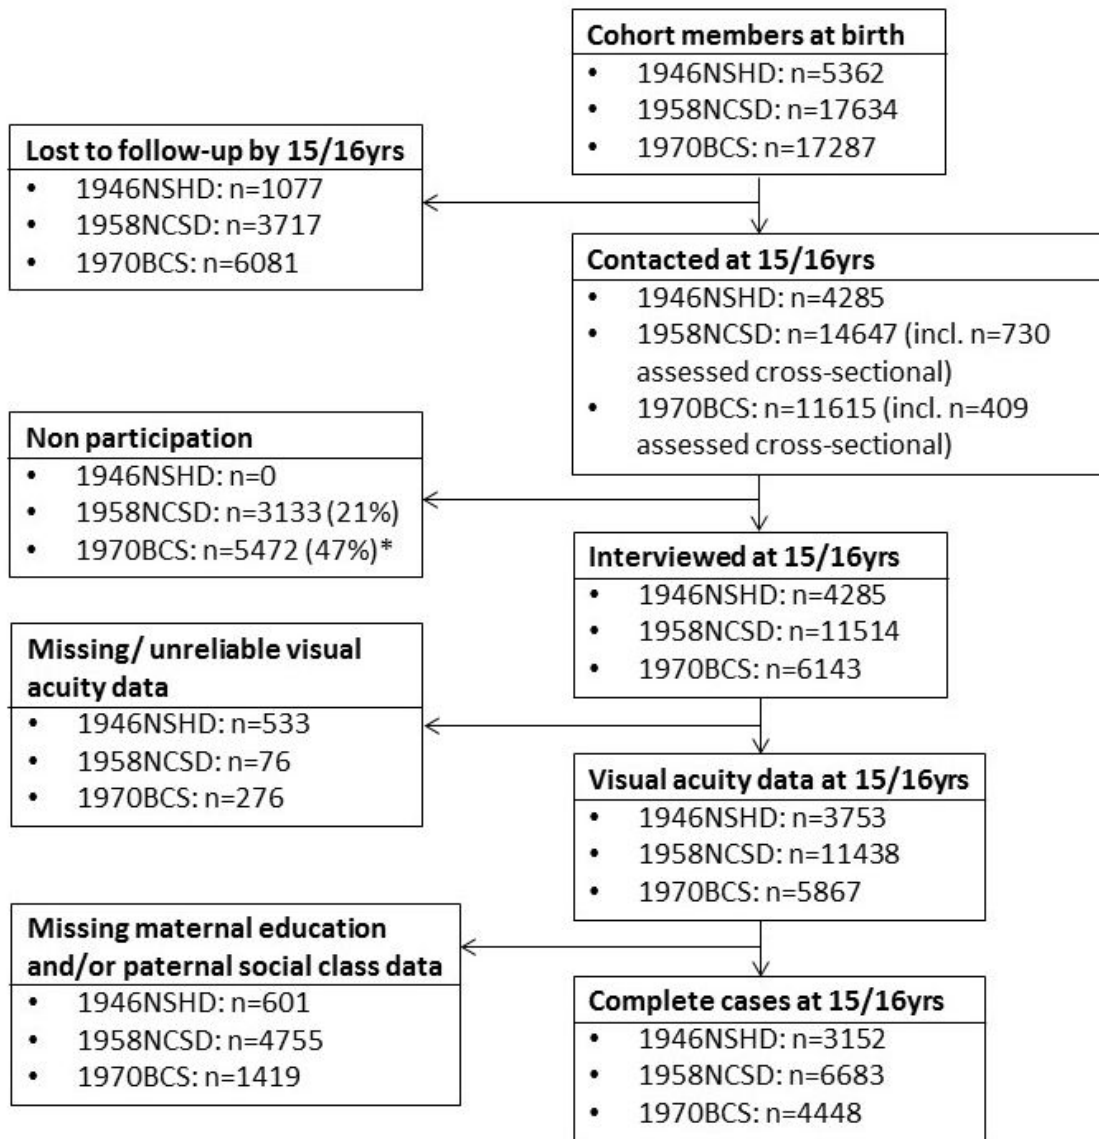

**eFigure 1:** Flow chart indicating recruitment and collection of ophthalmic data at age 15/16 years in three UK birth cohorts (Plewis I, Calderwood L, Hawkes D, Nathan G. National Child Development Study And 1970 British Cohort Study Technical Report: Changes in the NCDS and BCS70 Populations and Samples over Time. 1st Edition October 2004. Centre for Longitudinal Studies Bedford Group for Lifecourse and Statistical Studies Institute of Education, University of London). \* Data collection was performed at 1986 which was a year of industrial action in schools. This is reported to have disrupted the data collection as school medical examinations were given either by community medical officers or school nurses. The medical examination sample is low (53%) and biased towards higher paternal social class and females.

**eTable 1:** Distribution of the three UK birth cohort members' baseline characteristics according to their participating status.

|                                       | 1958             |              | 1970             |              |
|---------------------------------------|------------------|--------------|------------------|--------------|
|                                       | Non participants | Participants | Non participants | Participants |
| Sex, n                                | 3139             | 11514        | 5748             | 5867         |
| Male                                  | 46 (35; 57)      | 52 (51; 53)  | 51 (50; 53)      | 49 (47; 50)  |
| Female                                | 54 (43; 65)      | 48 (47; 49)  | 49 (47; 50)      | 51 (50; 53)  |
| Maternal education at birth, n        | 1565             | 9218         | 5255             | 5404         |
| Up to statutory schooling             | 54 (52; 57)      | 48 (47; 49)  | 35 (33; 36)      | 29 (27; 30)  |
| Stayed in FTE                         | 44 (41; 46)      | 49 (48; 50)  | 60 (59; 61)      | 64 (63; 65)  |
| Higher (college/univ)                 | 2 (1; 3)         | 3 (3; 4)     | 5 (5; 6)         | 7 (7; 8)     |
| Paternal social class at childhood, n | 1860             | 8097         | 4295             | 4768         |
| Unskilled                             | 25 (23; 27)      | 23 (22; 24)  | 18 (17; 20)      | 17 (16; 18)  |
| Skilled                               | 53 (51; 56)      | 52 (51; 53)  | 53 (52; 55)      | 50 (49; 52)  |
| Professional                          | 22 (20; 24)      | 24 (23; 25)  | 28 (27; 30)      | 33 (31; 34)  |

**eTable 2:** Distribution of the three UK birth cohort members' baseline characteristics according to recording of valid or missing acuity data.

|                                       | 1946                   |                | 1958                   |                | 1970                   |                |
|---------------------------------------|------------------------|----------------|------------------------|----------------|------------------------|----------------|
|                                       | Visual acuity data     |                |                        |                |                        |                |
|                                       | Missing/<br>inaccurate | Valid          | Missing/<br>inaccurate | Valid          | Missing/<br>inaccurate | Valid          |
| Sex, n                                | 532                    | 3753           | 76                     | 11438          | 276                    | 5867           |
| Male                                  | 48 (44; 52)            | 53 (51;<br>54) | 46 (35;<br>57)         | 52 (51;<br>53) | 50 (44;<br>56)         | 49 (47;<br>50) |
| Female                                | 52 (48; 56)            | 47 (46;<br>49) | 54 (43;<br>65)         | 48 (47;<br>49) | 50 (44;<br>56)         | 51 (50;<br>53) |
| Maternal education at birth, n        | 424                    | 3376           | 54                     | 9164           | 257                    | 5404           |
| Statutory schooling                   | 71 (67; 76)            | 71 (70;<br>73) | 54 (52;<br>57)         | 48 (47;<br>49) | 32 (27;<br>38)         | 29 (27;<br>30) |
| Extended schooling                    | 28 (23; 32)            | 28 (27;<br>30) | 44 (41;<br>46)         | 49 (48;<br>50) | 64 (58;<br>70)         | 64 (63;<br>65) |
| Higher education                      | 1 (0; 2)               | 1 (0; 1)       | 2 (1; 3)               | 3 (3; 4)       | 4 (1; 6)               | 7 (7; 8)       |
| Paternal social class at childhood, n | 425                    | 3421           | 44                     | 8053           | 211                    | 4768           |
| Unskilled                             | 25 (21; 29)            | 25 (24;<br>27) | 25 (23;<br>27)         | 23 (22;<br>24) | 19 (14;<br>24)         | 17 (16;<br>18) |
| Skilled                               | 49 (44; 54)            | 49 (48;<br>51) | 53 (51;<br>56)         | 52 (51;<br>53) | 55 (48;<br>62)         | 50 (49;<br>52) |

|              |             |                |                |                |                |                |
|--------------|-------------|----------------|----------------|----------------|----------------|----------------|
| Professional | 26 (22; 30) | 25 (24;<br>27) | 22 (20;<br>24) | 24 (23;<br>25) | 26 (20;<br>32) | 33 (31;<br>34) |
|--------------|-------------|----------------|----------------|----------------|----------------|----------------|

**eTable 3:** Distribution of cohort member's (CM's) social determinants of health at birth and early life across cohort.

|                             | 1946NSHD          | 1958NCSD       | 1970BCS        |
|-----------------------------|-------------------|----------------|----------------|
| Age CM's mum left FTE, n    | 3376              | 9164           | 5404           |
| Up to statutory schooling   | 71 (70; 73)       | 48 (47; 49)    | 29 (27; 30)    |
| Extended schooling          | 28 (27; 30)       | 49 (48; 50)    | 64 (63; 65)    |
| Higher education            | 0.71 (0.43; 0.99) | 3.3 (3.0; 3.7) | 7.3 (6.6; 8.0) |
| CM's father social class, n | 3421              | 8053           | 4768           |
| Unskilled/ semi-skilled     | 25 (24; 27)       | 23 (22; 24)    | 17 (16; 18)    |
| Skilled                     | 49 (48; 51)       | 52 (51; 54)    | 50 (49; 52)    |
| Professional                | 25 (24; 27)       | 24 (23; 25)    | 33 (31; 34)    |

**Footnote:** Results are shown as % (95% CI).
